# Supplementary figures and images for: Making biological membrane resistant to the toxicity of misfolded protein oligomers: a lesson from trodusquemine
Source: Royal Society of Chemistry journal article supplement (doi:10.1039/d0nr05285j), 2020-01-01

A

BODIPY TMR-X - Trodusquemine

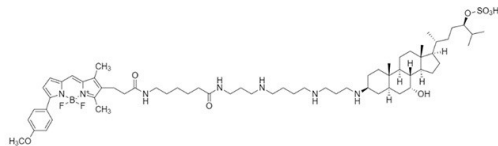

Alexa Fluor® 594 - Trodusquemine

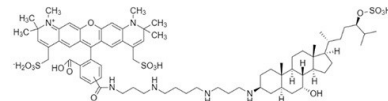

B

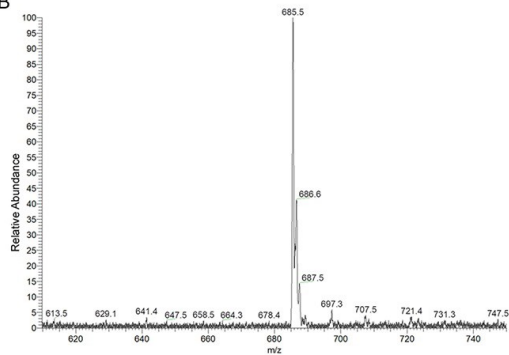

C

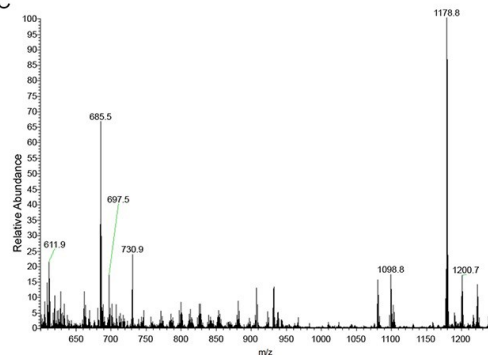

Supplement: d0nr05285j3.pdf [file d0nr05285j3.pdf]

A

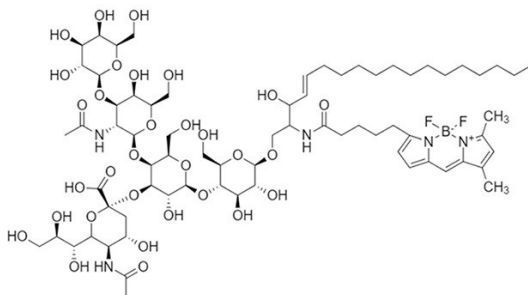

B

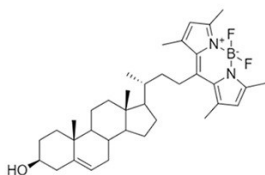

C

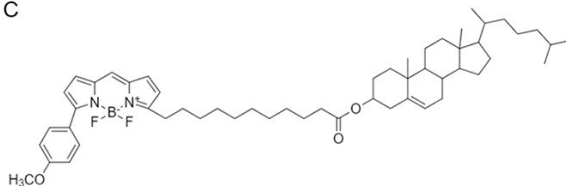

D

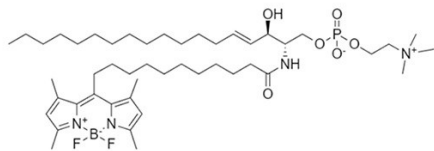

E

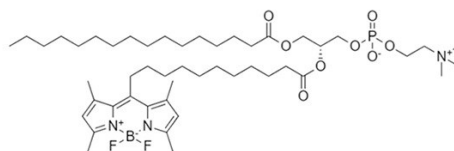

Supplement: d0nr05285j5.pdf [file d0nr05285j5.pdf]
